# Supplementary material
Source: PubMed Central journal article supplement (PMC4083795)

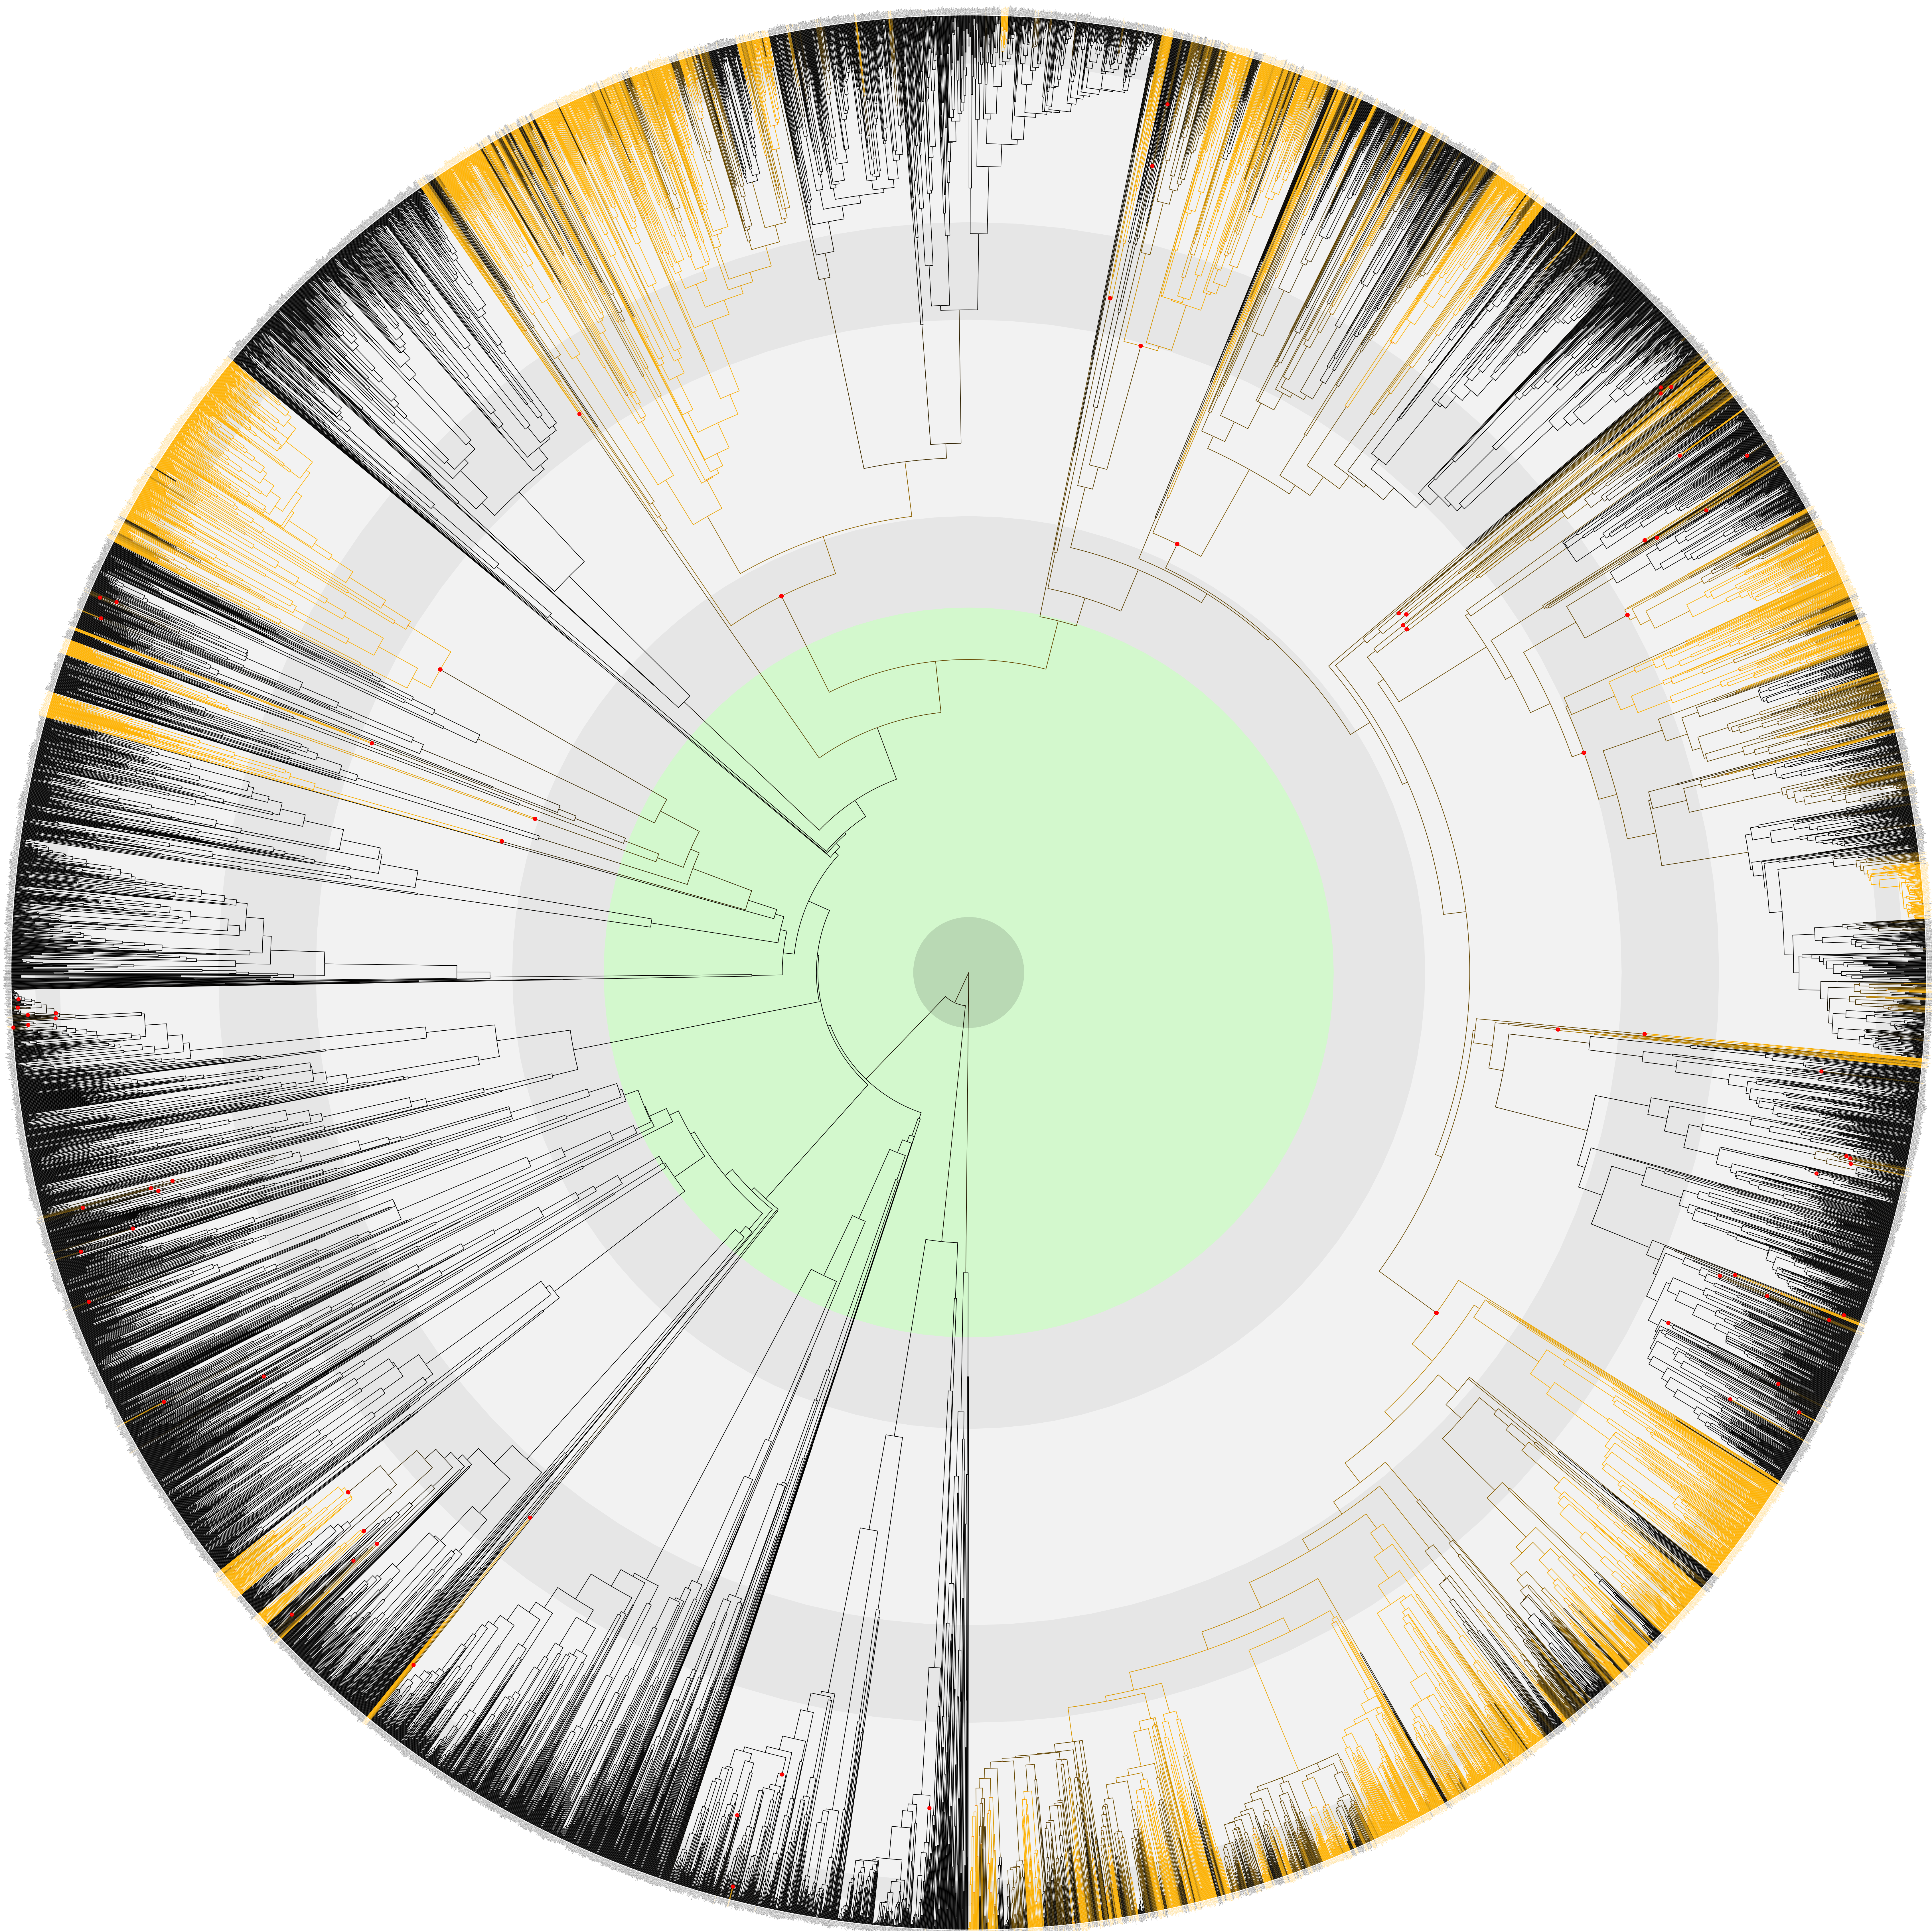

Supplement: rspb20140806supp2.pdf [file rspb20140806supp2.pdf]
